# Supplementary material for: Understanding concurrent heatwaves from a meridional heat transport perspective
Source: Copernicus journal article supplement (doi:10.5194/egusphere-2025-2189), 2025-05-16
Supplement: Supplementary file [file egusphere-2025-2189-AC2-supplement.pdf]

**I enjoyed your paper and your methods were quite interesting. I just have a few suggestions for making it more readable:**

*We thank you very much for the constructive comments. We plan to take them fully into account in a revised version of this manuscript. We answer briefly to the specific points raised in the following:*

- 1. Elaborate on the wavenumber decomposition section. In particular, I was confused by your discussion of the  $k=0$  correction. It was difficult to find an explanation even after tracing through your citations.**

*Thank you for the comment. Indeed, this point was raised by Reviewer 1 and calls for additional effort to clarify the methodology, that was briefly mentioned with a reference to previous work. We plan to revisit the manuscript accordingly.*

- 2. Elaborate on the selection of meridional heat transport (MHT) extremes. In particular, the processes of declustering using an "extremal index" and determining thresholds by latitude band using "[An] EVT-based convergence algorithm."**

*Thank you again for the comment. This is related to my previous reply. The methodology was extensively described in previous work but a revised manuscript needs to take these aspects into account in a more detailed way.*

- 3. Elaborate on how you calculated the anomalous MHT. It would be nice to have a short description on your process (e.g. whether you de-seasonalized) and a statement spelling out how a negative anomalous MHT translates to a weak (less positive or slightly negative) actual MHT.**

*Same as above. We will revise the manuscript in order to clarify these aspects of the methodology in a more extensive way.*
